# Supplementary material for: Antimicrobial Activity of Essential Oils Evaluated In Vitro against Escherichia coli and Staphylococcus aureus
Source: MDPI journal article supplement (doi:10.3390/antibiotics11070979), 2022-07-20
Supplement: s1 [file s1]

## Supplementary files

**Table S1.** Chemical composition of tested *Essential Oil*

<sup>a</sup>: standard compounds. Linear retention index (LRI) on HP-5MS column was experimentally determined using a homologous series of C10-C40 alkanes standard mixture (Van den Dool and Kratz, 1993). Arithmetic index (AI) was taken from Adams (2007) and/or the NIST 2017 Database (NIST 17, 2017. Mass Spectral Library (NIST/EPA/NIH). Gaithersburg, USA: National Institute of Standards and Technology. Last access 12\_2021). Similarity index/mass spectrum (SI/MS) was compared with data reported on NIST 2017 Database and were determined as reported by Koo et al. (2013), and Wan et al. (2002). Relative percentage values are means of three determinations with a structural equation modeling (SEM) in all cases below 10%. a) *Citrus lemon* Essential Oil; b) *Pinus sylvestris* Essential Oil; c) *Foeniculum vulgare* Essential Oil; d) *Ocimum basilicum* Essential Oil; e) *Melissa officinalis* Essential Oil; f) *Thymus vulgaris* Essential Oil; g) *Zingiber officinalis* Rosc. Essential Oil

a)

| N  | Components                 | LRI  | AI   | <i>Citrus lemon</i> |       |
|----|----------------------------|------|------|---------------------|-------|
|    |                            |      |      | Area±SEM            | SI/MS |
| 1  | Ethyl propanoate           | 714  | 714  | 0.10±0.010          | 91    |
| 2  | α-pinene <sup>a</sup>      | 930  | 931  | 2.42±0.52           | 95    |
| 3  | β-thujene                  | 968  | 968  | 1.94±0.20           | 86    |
| 4  | β-pinene <sup>a</sup>      | 982  | 980  | 14.55±1.05          | 94    |
| 5  | limonene <sup>a</sup>      | 1030 | 1032 | 53.19±5.11          | 93    |
| 6  | γ-terpinene <sup>a</sup>   | 1062 | 1064 | 5.91±1.02           | 94    |
| 7  | terpinolene                | 1083 | 1085 | 0.22±0.020          | 96    |
| 8  | β-linalool <sup>a</sup>    | 1100 | 1101 | 0.21±0.020          | 91    |
| 9  | (E)-p-menth-2,8-dien-1-ol  | 1122 | 1123 | 0.10±0.0020         | 80    |
| 10 | limonene oxide, cis-       | 1130 | 1131 | 1.01±0.87           | 96    |
| 11 | limonene oxide, trans-     | 1138 | 1138 | 0.68±0.080          | 91    |
| 12 | α-terpineol                | 1178 | 1179 | 0.30±0.020          | 80    |
| 13 | cis-carveol                | 1222 | 1222 | 0.26±0.020          | 96    |
| 14 | citral <sup>a</sup>        | 1240 | 1240 | 3.76±0.90           | 96    |
| 15 | Δ-carvone                  | 1242 | 1242 | 0.12±0.010          | 93    |
| 16 | nerol acetate              | 1363 | 1364 | 0.83±0.054          | 91    |
| 17 | geranyl acetate            | 1384 | 1385 | 0.87±0.056          | 91    |
| 18 | caryophyllene <sup>a</sup> | 1415 | 1415 | 0.13±0.012          | 99    |
| 19 | α-bergamotene              | 1431 | 1430 | 0.21±0.020          | 87    |
| 20 | β-bisabolene <sup>a</sup>  | 1504 | 1506 | 0.32±0.040          | 95    |
| 21 | caryophylleneoxyde         | 1596 | 1592 | 0.31±0.050          | 91    |
|    | % Characterized            | /    | /    | 87.44               | /     |
|    | Others                     | /    | /    | 12.56               | /     |

b)

| N  | Components                    | LRI  | AI   | <i>Pinus sylvestris</i> |       |
|----|-------------------------------|------|------|-------------------------|-------|
|    |                               |      |      | Area $\pm$ SEM          | SI/MS |
| 1  | Ethyl propanoate              | 714  | 714  | 0.11 $\pm$ 0.010        | 91    |
| 2  | santene                       | 892  | 890  | 0.17 $\pm$ 0.020        | 90    |
| 3  | cyclene                       | 920  | 919  | 0.19 $\pm$ 0.030        | 91    |
| 4  | $\alpha$ -pinene <sup>a</sup> | 930  | 931  | 29.05 $\pm$ 3.03        | 94    |
| 5  | camphene <sup>a</sup>         | 952  | 952  | 1.64 $\pm$ 0.30         | 97    |
| 6  | $\beta$ -thujene              | 968  | 968  | 1.24 $\pm$ 0.23         | 78    |
| 7  | $\beta$ -pinene <sup>a</sup>  | 982  | 980  | 17.16 $\pm$ 1.25        | 94    |
| 8  | $\alpha$ -terpinene           | 1014 | 1014 | 0.70 $\pm$ 0.050        | 91    |
| 9  | 3-carene <sup>a</sup>         | 1015 | 1016 | 13.12 $\pm$ 2.50        | 94    |
| 10 | o-cymene                      | 1021 | 1021 | 1.10 $\pm$ 0.81         | 95    |
| 11 | limonene <sup>a</sup>         | 1030 | 1032 | 9.75 $\pm$ 1.20         | 99    |
| 12 | terpinolene                   | 1083 | 1085 | 2.09 $\pm$ 0.87         | 96    |
| 13 | $\alpha$ -terpineol           | 1178 | 1179 | 0.52 $\pm$ 0.030        | 86    |
| 14 | p-cymen-8-ol                  | 1183 | 1183 | 0.37 $\pm$ 0.030        | 90    |
| 15 | myrtenol                      | 1196 | 1196 | 0.17 $\pm$ 0.010        | 91    |
| 16 | eucarvone                     | 1245 | 1245 | 0.12 $\pm$ 0.010        | 91    |
| 17 | bornylacetate <sup>a</sup>    | 1288 | 1289 | 5.66 $\pm$ 1.25         | 99    |
| 18 | $\alpha$ -cubebene            | 1347 | 1348 | 0.13 $\pm$ 0.010        | 97    |
| 19 | longifolene                   | 1412 | 1412 | 1.38 $\pm$ 0.49         | 99    |
| 20 | caryophyllene <sup>a</sup>    | 1415 | 1415 | 4.93 $\pm$ 0.88         | 99    |
| 21 | humulene                      | 1452 | 1451 | 0.47 $\pm$ 0.025        | 97    |
| 22 | caryophyllene oxyde           | 1596 | 1592 | 1.68 $\pm$ 0.29         | 91    |
|    | % Characterized               | /    | /    | 91.75                   | /     |
|    | Others                        | /    | /    | 8.25                    | /     |

c)

| N  | Components                          | LRI  | AI   | <i>Foeniculum vulgare</i> |       |
|----|-------------------------------------|------|------|---------------------------|-------|
|    |                                     |      |      | Area $\pm$ SEM            | SI/MS |
| 1  | Ethyl propanoate                    | 714  | 714  | 0.11 $\pm$ 0.010          | 91    |
| 2  | $\alpha$ -pinene <sup>a</sup>       | 930  | 931  | 6.38 $\pm$ 0.89           | 97    |
| 3  | camphene <sup>a</sup>               | 952  | 952  | 0.12 $\pm$ 0.010          | 94    |
| 4  | $\beta$ -pinene <sup>a</sup>        | 982  | 980  | 0.65 $\pm$ 0.070          | 95    |
| 5  | $\beta$ -myrcene                    | 990  | 991  | 1.10 $\pm$ 0.080          | 91    |
| 6  | $\alpha$ -phellandrene <sup>a</sup> | 1002 | 1003 | 5.13 $\pm$ 0.55           | 91    |
| 7  | o-cymene                            | 1021 | 1021 | 1.00 $\pm$ 0.070          | 95    |
| 8  | trans- $\beta$ -ocimene             | 1028 | 1027 | 0.58 $\pm$ 0.050          | 97    |
| 9  | limonene <sup>a</sup>               | 1030 | 1032 | 5.12 $\pm$ 1.01           | 94    |
| 10 | camphene hydrate                    | 1147 | 1147 | 1.98 $\pm$ 0.85           | 94    |
| 11 | $\gamma$ -terpinene <sup>a</sup>    | 1062 | 1064 | 0.15 $\pm$ 0.020          | 96    |
| 12 | estragole <sup>a</sup>              | 1198 | 1198 | 1.53 $\pm$ 0.074          | 98    |
| 13 | p-anisaldehyde                      | 1271 | 1270 | 0.61 $\pm$ 0.030          | 94    |
| 14 | anethole <sup>a</sup>               | 1283 | 1284 | 58.68 $\pm$ 3.87          | 98    |
| 15 | sabinyl acetate                     | 1291 | 1291 | 0.12 $\pm$ 0.010          | 64    |
| 16 | $\alpha$ -bergamotene               | 1431 | 1430 | 0.10 $\pm$ 0.012          | 93    |
|    | % Characterized                     | /    | /    | 83.36                     | /     |
|    | Others                              | /    | /    | 16.64                     | /     |

d)

| N  | Components                     | LRI  | AI   | <i>Ocimum basilicum</i> |       |
|----|--------------------------------|------|------|-------------------------|-------|
|    |                                |      |      | Area±SEM                | SI/MS |
| 1  | eucalyptol                     | 1023 | 1023 | 0.29±0.020              | 99    |
| 2  | cis-linalol oxide              | 1066 | 1066 | 0.44±0.03               | 90    |
| 3  | β-linalool <sup>a</sup>        | 1100 | 1101 | 16.98±2.55              | 97    |
| 4  | menthol                        | 1169 | 1169 | 0.57±0.040              | 91    |
| 5  | estragole <sup>a</sup>         | 1198 | 1198 | 73.04±6.09              | 98    |
| 6  | citral <sup>a</sup>            | 1240 | 1240 | 1.10±0.080              | 96    |
| 7  | caryophyllene <sup>a</sup>     | 1415 | 1415 | 0.43±0.020              | 99    |
| 8  | α-bergamotene                  | 1431 | 1430 | 3.18±0.40               | 94    |
| 9  | humulene                       | 1452 | 1451 | 0.23±0.023              | 94    |
| 10 | (E)-β-farnesene                | 1459 | 1459 | 0.41±0.020              | 97    |
| 11 | β-bisabolene <sup>a</sup>      | 1504 | 1506 | 0.13±0.0010             | 93    |
| 12 | trans-4-methoxy cinnamaldehyde | 1568 | 1570 | 0.92±0.080              | 97    |
| 13 | caryophyllene oxyde            | 1596 | 1592 | 0.22±0.012              | 80    |
|    | % Characterized                | /    | /    | 97.94                   | /     |
|    | Others                         | /    | /    | 2.06                    | /     |

e)

| N  | Components                      | LRI  | AI   | <i>Melissa officinalis</i> |       |
|----|---------------------------------|------|------|----------------------------|-------|
|    |                                 |      |      | Area±SEM                   | SI/MS |
| 1  | α-pinene <sup>a</sup>           | 930  | 931  | 0.34±0.040                 | 96    |
| 2  | camphene <sup>a</sup>           | 952  | 952  | 0.52±0.050                 | 96    |
| 3  | β-thujene                       | 968  | 968  | 0.20±0.010                 | 94    |
| 4  | β-pinene <sup>a</sup>           | 982  | 980  | 0.65±0.050                 | 91    |
| 5  | eucalyptol <sup>a</sup>         | 1023 | 1023 | 1.23±0.52                  | 98    |
| 6  | trans-β-ocimene                 | 1028 | 1027 | 0.11±0.050                 | 97    |
| 7  | limonene <sup>a</sup>           | 1030 | 1032 | 4.32±0.99                  | 94    |
| 8  | 4-nonanone (propyl amyl ketone) | 1052 | 1053 | 0.27±0.012                 | 91    |
| 9  | β-linalool <sup>a</sup>         | 1100 | 1101 | 0.96±0.25                  | 97    |
| 10 | citronellal                     | 1168 | 1170 | 0.55±0.050                 | 93    |
| 11 | α-terpineol                     | 1178 | 1179 | 0.27±0.015                 | 80    |
| 12 | citronellol                     | 1220 | 1221 | 0.34±0.060                 | 95    |
| 13 | citral <sup>a</sup>             | 1240 | 1240 | 42.7±3.45                  | 96    |
| 14 | geraniol                        | 1253 | 1254 | 2.13±1.03                  | 97    |
| 15 | α-cubebene                      | 1347 | 1348 | 0.40±0.020                 | 98    |
| 16 | eugenol                         | 1358 | 1359 | 0.15±0.010                 | 93    |
| 17 | β-ylangene                      | 1367 | 1368 | 0.13±0.012                 | 93    |
| 18 | α-copaene                       | 1374 | 1375 | 0.86±0.090                 | 99    |
| 19 | geranyl acetate                 | 1384 | 1385 | 1.95±0.10                  | 91    |
| 20 | β-elemene (-)                   | 1394 | 1394 | 0.16±0.012                 | 83    |
| 21 | caryophyllene <sup>a</sup>      | 1415 | 1415 | 25.29±1.05                 | 99    |
| 22 | trans-isoeugenol                | 1426 | 1427 | 0.27±0.012                 | 95    |
| 23 | α-bergamotene                   | 1431 | 1430 | 0.14±0.010                 | 87    |
| 24 | humulene                        | 1452 | 1451 | 4.39±0.92                  | 97    |
| 25 | alloaromadendrene               | 1458 | 1458 | 0.16±0.010                 | 90    |
| 26 | α-amorphene                     | 1483 | 1484 | 0.84±0.080                 | 97    |
| 27 | α-farnesene <sup>a</sup>        | 1509 | 1508 | 0.13±0.011                 | 93    |
| 28 | caryophyllene oxyde             | 1596 | 1592 | 2.18±0.87                  | 91    |
|    | % Characterized                 | /    | /    | 91.64                      | /     |
|    | Others                          | /    | /    | 8.36                       | /     |

f)

| N  | Components                          | LRI  | AI   | <i>Thymus vulgaris</i> |       |
|----|-------------------------------------|------|------|------------------------|-------|
|    |                                     |      |      | Area $\pm$ SEM         | SI/MS |
| 1  | Ethyl propanoate                    | 714  | 714  | 0.10 $\pm$ 0.010       | 86    |
| 3  | cyclene                             | 920  | 919  | 0.13 $\pm$ 0.090       | 94    |
| 4  | $\alpha$ -pinene <sup>a</sup>       | 930  | 931  | 1.81 $\pm$ 0.10        | 95    |
| 5  | camphene <sup>a</sup>               | 952  | 952  | 1.89 $\pm$ 0.11        | 96    |
| 6  | $\beta$ -thujene                    | 968  | 968  | 0.71 $\pm$ 0.060       | 93    |
| 7  | mushroom alcohol                    | 975  | 975  | 0.37 $\pm$ 0.020       | 83    |
| 8  | $\beta$ -pinene <sup>a</sup>        | 982  | 980  | 0.56 $\pm$ 0.030       | 94    |
| 9  | $\beta$ -myrcene                    | 990  | 991  | 1.42 $\pm$ 0.080       | 86    |
| 10 | $\alpha$ -phellandrene <sup>a</sup> | 1002 | 1003 | 0.15 $\pm$ 0.010       | 91    |
| 11 | o-cymene                            | 1021 | 1021 | 19.64 $\pm$ 1.50       | 95    |
| 12 | eucalyptol <sup>a</sup>             | 1023 | 1023 | 0.89 $\pm$ 0.050       | 99    |
| 13 | limonene <sup>a</sup>               | 1030 | 1032 | 0.60 $\pm$ 0.040       | 91    |
| 14 | $\gamma$ -terpinene <sup>a</sup>    | 1062 | 1064 | 8.83 $\pm$ 1.03        | 94    |
| 15 | terpinolene                         | 1083 | 1085 | 1.33 $\pm$ 0.88        | 97    |
| 16 | $\beta$ -linalool <sup>a</sup>      | 1100 | 1101 | 4.07 $\pm$ 1.02        | 97    |
| 17 | camphor                             | 1145 | 1146 | 1.69 $\pm$ 0.85        | 98    |
| 18 | terpineol, cis- $\beta$ -           | 1147 | 1147 | 0.13 $\pm$ 0.010       | 90    |
| 19 | endo-borneol                        | 1166 | 1167 | 1.85 $\pm$ 0.70        | 97    |
| 20 | terpinen-4-ol                       | 1171 | 1171 | 1.83 $\pm$ 0.83        | 96    |
| 21 | $\alpha$ -terpineol                 | 1178 | 1179 | 0.12 $\pm$ 0.010       | 86    |
| 22 | anisole                             | 1234 | 1235 | 0.39 $\pm$ 0.060       | 90    |
| 23 | anisole, 2-isopropyl-4-methyl-      | 1244 | 1244 | 0.42 $\pm$ 0.050       | 94    |
| 24 | thymol <sup>a</sup>                 | 1290 | 1290 | 47.01 $\pm$ 3.32       | 94    |
| 25 | caryophyllene <sup>a</sup>          | 1415 | 1415 | 2.18 $\pm$ 0.87        | 99    |
| 26 | caryophyllene oxyde                 | 1596 | 1592 | 0.58 $\pm$ 0.030       | 91    |
|    | % Characterized                     | /    | /    | 98.70                  | /     |
|    | Others                              | /    | /    | 1.30                   | /     |

g)

| N  | Components                        | LRI  | AI   | <i>Zingiber officinalis</i> Rosc. |       |
|----|-----------------------------------|------|------|-----------------------------------|-------|
|    |                                   |      |      | Area±SEM                          | SI/MS |
| 1  | hexanal                           | 805  | 801  | 0.15 ± 0.013                      | 91    |
| 2  | α-pinene <sup>a</sup>             | 930  | 931  | 1.73 ± 0.12                       | 97    |
| 3  | camphene <sup>a</sup>             | 952  | 952  | 4.74 ± 0.27                       | 96    |
| 4  | β-pinene                          | 976  | 974  | 0.71 ± 0.11                       | 97    |
| 5  | prenylacetone                     | 987  | 986  | 0.41 ± 0.074                      | 90    |
| 6  | α-phellandrene <sup>a</sup>       | 1003 | 1002 | 4.35 ± 0.57                       | 87    |
| 7  | eucalyptol <sup>a</sup>           | 1023 | 1023 | 1.93 ± 0.42                       | 98    |
| 8  | terpinolene                       | 1087 | 1086 | 0.17 ± 0.023                      | 96    |
| 9  | linalol                           | 1094 | 1095 | 0.23 ± 0.091                      | 91    |
| 10 | endo borneol <sup>a</sup>         | 1166 | 1167 | 1.01 ± 0.12                       | 97    |
| 11 | α-terpineol                       | 1187 | 1186 | 0.52 ± 0.24                       | 91    |
| 12 | decanal                           | 1206 | 1201 | 0.13 ± 0.065                      | 87    |
| 13 | citronellol                       | 1228 | 1223 | 0.13 ± 0.061                      | 96    |
| 14 | geraniol                          | 1252 | 1249 | 0.25 ± 0.098                      | 90    |
| 15 | bornyl acetate                    | 1284 | 1287 | 0.13 ± 0.096                      | 98    |
| 16 | 2-undecanone                      | 1294 | 1293 | 0.22 ± 0.10                       | 94    |
| 17 | α-cubebene                        | 1348 | 1345 | 0.72 ± 0.13                       | 95    |
| 18 | cyclosativene                     | 1364 | 1362 | 0.58 ± 0.21                       | 94    |
| 19 | 2-butyl-2-octenal                 | 1375 | 1372 | 0.17 ± 0.096                      | 96    |
| 20 | geranyl acetate                   | 1385 | 1379 | 0.49 ± 0.17                       | 91    |
| 21 | caryophyllene                     | 1425 | 1417 | 0.14 ± 0.098                      | 93    |
| 22 | α-bergamotene                     | 1430 | 1432 | 0.17 ± 0.065                      | 93    |
| 23 | γ-elemene                         | 1439 | 1434 | 0.56 ± 0.19                       | 98    |
| 24 | β-farnesene                       | 1451 | 1454 | 0.73 ± 0.13                       | 97    |
| 25 | alloaromadendrene                 | 1457 | 1458 | 0.56 ± 0.15                       | 92    |
| 26 | α-elemene                         | 1467 | 1469 | 0.21 ± 0.096                      | 90    |
| 27 | α-curcumene <sup>a</sup>          | 1479 | 1481 | 15.2 ± 1.12                       | 99    |
| 28 | zingiberene <sup>a</sup>          | 1495 | 1493 | 32.1 ± 1.78                       | 93    |
| 29 | α-muurolene                       | 1502 | 1500 | 0.29 ± 0.11                       | 97    |
| 30 | α-farnesene <sup>a</sup>          | 1506 | 1505 | 7.23 ± 0.98                       | 93    |
| 31 | β-bisabolene <sup>a</sup>         | 1507 | 1505 | 2.29 ± 0.25                       | 93    |
| 32 | β-sesquiphellandrene <sup>a</sup> | 1523 | 1521 | 10.91 ± 1.10                      | 90    |
| 33 | cubenene                          | 1529 | 1533 | 1.27 ± 0.27                       | 93    |
| 34 | cis-sesquisabinene hydrate        | 1539 | 1542 | 0.41 ± 0.23                       | 86    |
| 35 | β-elemol                          | 1542 | 1548 | 0.51 ± 0.12                       | 91    |
| 36 | β-nerolidol                       | 1562 | 1561 | 0.87 ± 0.23                       | 90    |
| 37 | trans-sesquisabinene hydrate      | 1579 | 1577 | 0.39 ± 0.29                       | 93    |
| 38 | beta-eudesmol                     | 1653 | 1649 | 0.25 ± 0.11                       | 99    |
|    | % Characterized                   | /    | /    | 92.85                             | /     |
|    | Others                            | /    | /    | 7.15                              | /     |
